# Supplementary material for: LncRNAs LY86-AS1 and VIM-AS1 Distinguish Plasma Cell Leukemia Patients from Multiple Myeloma Patients
Source: MDPI journal article supplement (doi:10.3390/biomedicines9111637), 2021-11-08
Supplement: s1 [file s1]

## SUPPLEMENTARY FIGURES AND TABLES

**Table S1.** Baseline characteristics of multiple myeloma (MM) and plasma cell leukemia (PCL) patients used in next-generation sequencing (NGS) and RT-qPCR analysis.

| Baseline characteristics <sup>1</sup> :                | MM                                         | PCL                                        |
|--------------------------------------------------------|--------------------------------------------|--------------------------------------------|
| No. of patients                                        | 34                                         | 23                                         |
| Gender: males - females                                | 29.4 - 70.6                                | 44.2 - 55.8                                |
| Age median (min-max) (years)                           | 72 (45- 86)                                | 69 (42 - 83)                               |
| ISS stage: I-II-III                                    | 17.6 - 41.2 - 41.2                         | NA - 34.1 - 65.9                           |
| ECOG PS: 0-1-2-3-4                                     | 14.7 - 35.3 - 32.4 - 11.8 - 5.9            | 43.8 - 39.6 - NA - NA                      |
| Ig isotype: G-A-LC only-M-D-Bicl-NS                    | 64.7 - 17.6 - 14.7 - NA -<br>NA - NA - 2.9 | 40.0 - 17.5 - 19.2 - 9.1 -<br>NA - NA - NA |
| Light chains: kappa-lambda                             | 72.7 - 27.3                                | 56.8 - 43.2                                |
| Previous treatment lines: 0-1-2-4                      | NA                                         | 50 - 30 - 10 - 10                          |
| cPCs (%)                                               | 0.2 (0.00 - 4.6)                           | 19.4 (7.0 - 67.5)                          |
| <b>Biochemistry at diagnosis<sup>2</sup>:</b>          |                                            |                                            |
| Hemoglobin level (g/l)                                 | 95.7 (63.2 - 141.0)                        | 93.2 (66.9 - 139.0)                        |
| Thrombocyte count (x10 <sup>9</sup> /l)                | 182.0 (69.4 - 357.0)                       | 83.6 (37.6 - 201.0)                        |
| Calcium total level (mmol/l)                           | 2.4 (2.0 - 3.5)                            | 2.5 (1.9 - 4.7)                            |
| Albumin level (g/l)                                    | 32.5 (19.2 - 46.5)                         | 34.4 (22.5 - 50.0)                         |
| Creatinine level (μmol/l)                              | 92.0 (50.0 - 913.0)                        | 164.5 (49.0 - 781.0)                       |
| β2-microglobulin (mg/l)                                | 4.4 (2.1 - 50.0)                           | 8.7 (2.4 - 44.9)                           |
| Lactate dehydrogenase (μkat/l)                         | 3.6 (1.4 - 7.3)                            | 6.0 (1.2 - 22.9)                           |
| C-reactive protein (mg/l)                              | 4.2 (0.0 - 69.2)                           | 10.7 (1.0 - 42.3)                          |
| <b>Cytogenetics at MM / PCL diagnosis<sup>3</sup>:</b> |                                            |                                            |
| No. of patients                                        | 34 (100%)                                  | 12 (52%)                                   |
| IgH disruption: positive                               | 30.80%                                     | 100.00%                                    |
| Translocation t(11;14): positive                       | 0.00%                                      | 100.00%                                    |
| Translocation t(4;14): positive                        | 31.30%                                     | 60.00%                                     |
| Translocation t(6;14): positive                        | 0.00%                                      | 100.00%                                    |
| Translocation t(14;16): positive                       | 6.70%                                      | 33.30%                                     |
| del(13)(q14)/monosomy 13: positive                     | 76.90%                                     | 63.60%                                     |
| gain 1q21: positive                                    | 65.40%                                     | 90.90%                                     |
| del(17)(p13): positive                                 | 20.00%                                     | 27.30%                                     |
| Hyperdiploidy: positive                                | 33.30%                                     | 37.50%                                     |

<sup>1</sup>: Described using N (%) and/ or median (minimum - maximum). <sup>2</sup>: Described using median (minimum - maximum). <sup>3</sup>: Described using N(%). Only 12 samples from PCL patients out of 23 have been analyzed for cytogenetic changes. NA = not available, Bicl – bclonal, NS – non-secretory

**Table S2:** Previous therapy in any treatment line before sPCL diagnosis.

| Previous therapy of patients diagnosed with sPCL (N = 11 patients with sPCL) <sup>1</sup> | Statistics <sup>2</sup> |
|-------------------------------------------------------------------------------------------|-------------------------|
| <b>Proteasome inhibitors (PI)</b>                                                         | <b>8 (72.7%)</b>        |
| bortezomib                                                                                | 8 (72.7%)               |
| <b>Immunomodulatory drugs (IMiD)</b>                                                      | <b>6 (54.5%)</b>        |
| thalidomide                                                                               | 4 (36.4%)               |
| lenalidomide                                                                              | 3 (27.3%)               |
| <b>PI + IMiD</b>                                                                          | <b>5 (45.5%)</b>        |
| <b>Corticosteroids</b>                                                                    | <b>9 (81.8%)</b>        |
| <b>Conventional chemotherapy</b>                                                          | <b>8 (72.7%)</b>        |
| <b>Transplantation</b>                                                                    | <b>3 (27.3%)</b>        |
| <b>Number of previous treatment lines</b>                                                 |                         |
| 1                                                                                         | 6 (54.5%)               |
| 2                                                                                         | 3 (27.3%)               |
| 4                                                                                         | 2 (18.2%)               |
| median (min–max)                                                                          | 1 (1–4)                 |
| <b>Time from MM to PCL diagnosis (months), median (min–max)</b>                           | <b>14.0 (3.8–60.1)</b>  |

<sup>1</sup>Respective treatment modalities could be combined.

<sup>2</sup>Described using N (%) in categorical variables and median (minimum–maximum) in continuous variables.

**Table S3:** TaqMan Assays of validated long non-coding RNAs (lncRNAs).

| LncRNAs  | Life Technologies Assay ID | Catalog Number |
|----------|----------------------------|----------------|
| LY86-AS1 | Hs00543584_m1              | 4331182        |
| VIM-AS1  | Hs04402632_m1              | 4426961        |
| MIR9-3HG | Hs00288663_m1              | 4331182        |
| PCAT7    | Hs04406635_m1              | 4426961        |

**Table S4:** LncRNAs with significantly deregulated expression level between multiple myeloma patients and patients with plasma cell leukemia (adjusted  $P < 0.001$ ) as detected by next-generation sequencing analysis during the exploration phase of the study.

| LncRNA     | ENSG <sup>1</sup> | logFC <sup>2</sup> | AveExpr <sup>3</sup> | P-value                | adj P-value            |
|------------|-------------------|--------------------|----------------------|------------------------|------------------------|
| VIM-AS1    | ENSG00000229124   | 1.597              | 11.059               | 2.669x10 <sup>-9</sup> | 2.034x10 <sup>-5</sup> |
| AL358053.1 | ENSG00000287465   | -2.309             | 3.481                | 9.307x10 <sup>-8</sup> | 1.489x10 <sup>-4</sup> |
| ZBTB20-AS5 | ENSG00000242290   | -1.417             | 6.183                | 1.038x10 <sup>-7</sup> | 1.489x10 <sup>-4</sup> |
| AL133415.1 | ENSG00000234961   | 1.303              | 11.585               | 1.021x10 <sup>-7</sup> | 1.489x10 <sup>-4</sup> |
| AC006296.2 | ENSG00000251412   | -2.804             | 1.693                | 1.087x10 <sup>-7</sup> | 1.489x10 <sup>-4</sup> |
| AC006296.1 | ENSG00000248425   | -2.708             | 1.173                | 1.173x10 <sup>-7</sup> | 1.489x10 <sup>-4</sup> |
| PCAT7      | ENSG00000231806   | -3.876             | 3.370                | 2.308x10 <sup>-7</sup> | 1.984x10 <sup>-4</sup> |
| LINC02231  | ENSG00000248995   | -2.439             | 0.964                | 2.124x10 <sup>-7</sup> | 1.984x10 <sup>-4</sup> |
| AC012321.1 | ENSG00000260772   | -1.060             | 5.570                | 2.727x10 <sup>-7</sup> | 1.984x10 <sup>-4</sup> |
| AC006296.3 | ENSG00000287360   | -2.470             | 1.931                | 2.709x10 <sup>-7</sup> | 1.984x10 <sup>-4</sup> |
| Z92544.1   | ENSG00000261659   | 1.089              | 5.126                | 2.996x10 <sup>-7</sup> | 1.984x10 <sup>-4</sup> |
| AC021979.1 | ENSG00000258594   | -2.874             | 1.777                | 3.126x10 <sup>-7</sup> | 1.984x10 <sup>-4</sup> |
| ZBTB20-AS2 | ENSG00000241295   | -1.553             | 4.700                | 3.682x10 <sup>-7</sup> | 2.158x10 <sup>-4</sup> |
| AC079416.4 | ENSG00000280227   | -1.000             | 5.015                | 5.556x10 <sup>-7</sup> | 2.919x10 <sup>-4</sup> |
| LINC02576  | ENSG00000232613   | -2.142             | 5.227                | 5.748x10 <sup>-7</sup> | 2.919x10 <sup>-4</sup> |
| AL391834.2 | ENSG00000273226   | -1.267             | 3.945                | 6.165x10 <sup>-7</sup> | 2.936x10 <sup>-4</sup> |
| AC087752.3 | ENSG00000253878   | -1.557             | 5.359                | 7.384x10 <sup>-7</sup> | 3.309x10 <sup>-4</sup> |
| AL162719.1 | ENSG00000285717   | -2.995             | 2.160                | 8.139x10 <sup>-7</sup> | 3.445x10 <sup>-4</sup> |
| AC012313.1 | ENSG00000232098   | 1.230              | 4.096                | 9.237x10 <sup>-7</sup> | 3.520x10 <sup>-4</sup> |
| AC092155.1 | ENSG00000226622   | -2.470             | 2.229                | 9.642x10 <sup>-7</sup> | 3.520x10 <sup>-4</sup> |
| AC119673.2 | ENSG00000286619   | -3.273             | 4.409                | 1.013x10 <sup>-6</sup> | 3.520x10 <sup>-4</sup> |
| ZBTB20-AS1 | ENSG00000241560   | -1.199             | 7.417                | 1.016x10 <sup>-6</sup> | 3.520x10 <sup>-4</sup> |
| AL450992.1 | ENSG00000229021   | 2.448              | 2.044                | 1.218x10 <sup>-6</sup> | 4.035x10 <sup>-4</sup> |
| AC009948.3 | ENSG00000279598   | -1.988             | 5.019                | 1.716x10 <sup>-6</sup> | 5.231x10 <sup>-4</sup> |
| AC093010.2 | ENSG00000259976   | -1.312             | 10.739               | 1.646x10 <sup>-6</sup> | 5.226x10 <sup>-4</sup> |
| LINC01712  | ENSG00000231364   | -2.378             | 1.993                | 1.909x10 <sup>-6</sup> | 5.595x10 <sup>-4</sup> |
| AC068051.1 | ENSG00000197585   | -1.969             | 3.451                | 2.330x10 <sup>-6</sup> | 6.335x10 <sup>-4</sup> |
| AL161640.1 | ENSG00000230404   | -3.135             | 1.409                | 2.439x10 <sup>-6</sup> | 6.335x10 <sup>-4</sup> |
| AC008569.1 | ENSG00000267379   | 1.212              | 6.403                | 2.425x10 <sup>-6</sup> | 6.335x10 <sup>-4</sup> |
| SEMA6A-AS1 | ENSG00000248445   | -1.068             | 4.589                | 2.520x10 <sup>-6</sup> | 6.335x10 <sup>-4</sup> |
| AL024508.1 | ENSG00000272189   | -1.610             | 2.343                | 2.614x10 <sup>-6</sup> | 6.335x10 <sup>-4</sup> |
| AC016745.2 | ENSG00000272563   | -2.614             | 3.020                | 2.744x10 <sup>-6</sup> | 6.335x10 <sup>-4</sup> |
| AL360181.2 | ENSG00000235245   | 1.543              | 2.792                | 2.664x10 <sup>-6</sup> | 6.335x10 <sup>-4</sup> |
| AC026333.4 | ENSG00000274191   | -2.021             | 2.220                | 3.656x10 <sup>-6</sup> | 8.193x10 <sup>-4</sup> |
| AP003721.1 | ENSG00000256196   | 1.575              | 2.802                | 4.681x10 <sup>-6</sup> | 9.412x10 <sup>-4</sup> |
| PLCB1-IT1  | ENSG00000225479   | 2.520              | 3.080                | 4.739x10 <sup>-6</sup> | 9.412x10 <sup>-4</sup> |
| LY86-AS1   | ENSG00000216863   | -2.644             | 4.628                | 4.698x10 <sup>-6</sup> | 9.412x10 <sup>-4</sup> |
| AC068491.2 | ENSG00000270190   | 2.642              | 1.366                | 4.567x10 <sup>-6</sup> | 9.412x10 <sup>-4</sup> |
| AC079906.1 | ENSG00000274723   | -2.188             | 1.122                | 5.136x10 <sup>-6</sup> | 9.412x10 <sup>-4</sup> |
| AC108463.3 | ENSG00000271590   | 2.628              | 2.792                | 5.261x10 <sup>-6</sup> | 9.412x10 <sup>-4</sup> |
| AL022098.1 | ENSG00000287920   | -1.251             | 7.062                | 5.066x10 <sup>-6</sup> | 9.412x10 <sup>-4</sup> |
| MIR9-3HG   | ENSG00000255571   | -4.075             | 5.022                | 5.463x10 <sup>-6</sup> | 9.459x10 <sup>-4</sup> |
| LINC02090  | ENSG00000230969   | -2.330             | 3.018                | 5.747x10 <sup>-6</sup> | 9.596x10 <sup>-4</sup> |
| AP000560.1 | ENSG00000278879   | -1.135             | 7.303                | 5.245x10 <sup>-6</sup> | 9.412x10 <sup>-4</sup> |

|            |                 |        |       |                        |                        |
|------------|-----------------|--------|-------|------------------------|------------------------|
| SEMA6A-AS2 | ENSG00000249167 | -2.223 | 1.862 | 5.822x10 <sup>-6</sup> | 9.596x10 <sup>-4</sup> |
| IFNG-AS1   | ENSG00000255733 | -1.835 | 8.785 | 5.312x10 <sup>-6</sup> | 9.412x10 <sup>-4</sup> |
| LINC02389  | ENSG00000255693 | -2.680 | 3.853 | 6.172x10 <sup>-6</sup> | 9.596x10 <sup>-4</sup> |
| AL158206.1 | ENSG00000260912 | -1.689 | 4.848 | 5.987x10 <sup>-6</sup> | 9.596x10 <sup>-4</sup> |
| LINC00373  | ENSG00000231019 | -2.223 | 2.116 | 6.589x10 <sup>-6</sup> | 9.982x10 <sup>-4</sup> |
| AC002350.2 | ENSG00000278993 | 1.043  | 4.097 | 6.797x10 <sup>-6</sup> | 9.982x10 <sup>-4</sup> |
| AC010680.3 | ENSG00000271011 | -1.897 | 2.232 | 6.813x10 <sup>-6</sup> | 9.982x10 <sup>-4</sup> |
| AP005212.4 | ENSG00000283294 | -2.081 | 6.930 | 6.156x10 <sup>-6</sup> | 9.596x10 <sup>-4</sup> |

<sup>1</sup> ENSG – Ensembl Gene ID, <sup>2</sup> FC - fold change, <sup>3</sup> AveExpr - average log-expression values.

**Table S5:** Normalized expression levels of significantly deregulated lncRNAs lymphocyte antigen antisense RNA 1 (LY86-AS1) and VIM Antisense RNA 1 (VIM-AS1) in validation phase of the study.

| Diagnosis | Sample | LY86-AS1 ( $2^{-\Delta Ct}$ ) | VIM-AS1 ( $2^{-\Delta Ct}$ ) |
|-----------|--------|-------------------------------|------------------------------|
| MM        | 1      | $5.143 \times 10^{-5}$        | $1.185 \times 10^{-3}$       |
|           | 2      | $1.440 \times 10^{-4}$        | $1.141 \times 10^{-2}$       |
|           | 3      | $8.461 \times 10^{-3}$        | $1.899 \times 10^{-2}$       |
|           | 4      | $3.038 \times 10^{-3}$        | $7.941 \times 10^{-3}$       |
|           | 5      | $1.992 \times 10^{-5}$        | $6.531 \times 10^{-3}$       |
|           | 6      | $1.636 \times 10^{-4}$        | $1.921 \times 10^{-3}$       |
|           | 7      | $1.371 \times 10^{-4}$        | $2.107 \times 10^{-3}$       |
|           | 8      | $1.083 \times 10^{-3}$        | $1.423 \times 10^{-2}$       |
|           | 9      | $1.358 \times 10^{-3}$        | $1.151 \times 10^{-3}$       |
|           | 10     | $2.324 \times 10^{-4}$        | $4.604 \times 10^{-3}$       |
|           | 11     | $6.596 \times 10^{-5}$        | $2.852 \times 10^{-3}$       |
|           | 12     | $8.806 \times 10^{-6}$        | $1.924 \times 10^{-3}$       |
|           | 13     | $2.585 \times 10^{-4}$        | $5.676 \times 10^{-3}$       |
|           | 14     | $3.262 \times 10^{-3}$        | $1.414 \times 10^{-3}$       |
|           | 15     | $9.312 \times 10^{-5}$        | $5.884 \times 10^{-4}$       |
|           | 16     | $2.485 \times 10^{-5}$        | $4.208 \times 10^{-3}$       |
|           | 17     | $2.383 \times 10^{-4}$        | $1.027 \times 10^{-3}$       |
|           | 18     | $4.481 \times 10^{-4}$        | $1.282 \times 10^{-3}$       |
|           | 19     | $6.547 \times 10^{-3}$        | $3.235 \times 10^{-3}$       |
|           | 20     | 0                             | $1.717 \times 10^{-3}$       |
|           | 21     | $9.621 \times 10^{-4}$        | $1.190 \times 10^{-3}$       |
|           | 22     | $4.261 \times 10^{-4}$        | $1.399 \times 10^{-3}$       |
|           | 23     | $8.118 \times 10^{-4}$        | $2.557 \times 10^{-3}$       |
|           | 24     | $4.998 \times 10^{-4}$        | $5.743 \times 10^{-4}$       |
|           | 25     | $1.130 \times 10^{-3}$        | $2.071 \times 10^{-3}$       |
|           | 26     | $1.524 \times 10^{-3}$        | $1.798 \times 10^{-3}$       |
|           | 27     | $1.211 \times 10^{-4}$        | $9.055 \times 10^{-4}$       |
|           | 28     | $1.136 \times 10^{-3}$        | $7.818 \times 10^{-4}$       |
| PCL       | 1      | $6.264 \times 10^{-6}$        | $8.823 \times 10^{-4}$       |
|           | 2      | $7.168 \times 10^{-6}$        | $7.842 \times 10^{-4}$       |
|           | 3      | 0                             | $3.644 \times 10^{-4}$       |
|           | 4      | $2.259 \times 10^{-5}$        | $1.087 \times 10^{-3}$       |
|           | 5      | $3.463 \times 10^{-6}$        | $2.650 \times 10^{-3}$       |
|           | 6      | $6.934 \times 10^{-5}$        | $2.174 \times 10^{-3}$       |
|           | 7      | $2.530 \times 10^{-4}$        | $1.047 \times 10^{-3}$       |
|           | 8      | $4.212 \times 10^{-5}$        | $3.985 \times 10^{-4}$       |
|           | 9      | $5.282 \times 10^{-5}$        | $9.732 \times 10^{-4}$       |
|           | 10     | $1.990 \times 10^{-6}$        | $1.766 \times 10^{-3}$       |
|           | 11     | $3.351 \times 10^{-6}$        | $9.059 \times 10^{-3}$       |
|           | 12     | $2.218 \times 10^{-6}$        | $7.622 \times 10^{-4}$       |

MM – multiple myeloma, PCL – plasma cell leukemia

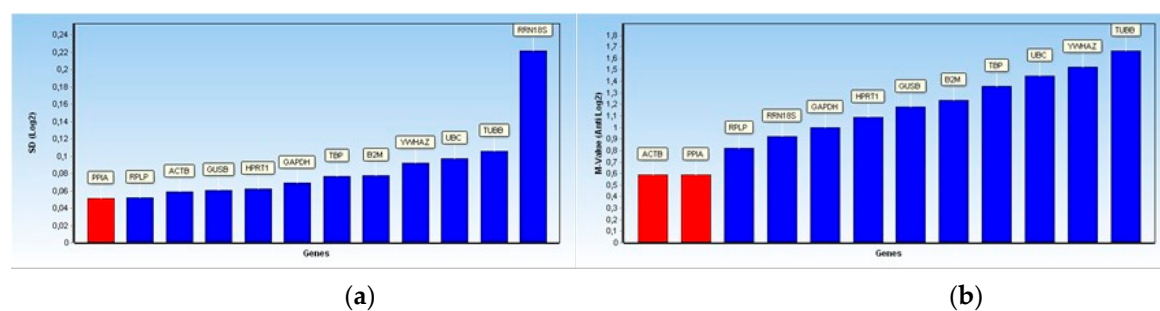

**Figure S1.** Housekeeping gene analysis for normalization using TATAA Reference Gene Panel: (a) GeNorm software analysis. PPIA housekeeping gene with  $M = 0.586$  and (b) NormFinder software analysis. PPIA housekeeping gene with  $SD = 0.0513$ .
